# Supplementary material for: Role of Cr Element in Highly Dense Passivation of Fe-Based Amorphous Alloy
Source: MDPI journal article supplement (doi:10.3390/ma16206630), 2023-10-10
Supplement: s1 [file s1]

# Role of Cr Element in Highly Dense Passivation of Fe-Based Amorphous Alloy

Ziqi Song <sup>1</sup>, Zhaoxuan Wang <sup>1</sup>, Qi Chen <sup>1</sup>, Zhigang Qi <sup>1</sup>, Ki Buem Kim <sup>2</sup> and Weimin Wang <sup>1,\*</sup>

<sup>1</sup> Key Laboratory for Liquid-Solid Structural Evolution and Processing of Materials (Ministry of Education), School of Materials Science and Engineering, Shandong University, Jinan 250061, China; 202234218@mail.sdu.edu.cn (Z.S.); 202114121@mail.sdu.edu.cn (Z.W.); 202120538@mail.sdu.edu.cn (Q.C.); 202034203@mail.sdu.edu.cn (Z.Q.)

<sup>2</sup> Department of Nanotechnology and Advanced Materials Engineering, Sejong University, Seoul 05006, Republic of Korea; kbbkim@sejong.ac.kr

\* Correspondence: weiminw@sdu.edu.cn

## 1. The Supplementary Figures and Tables

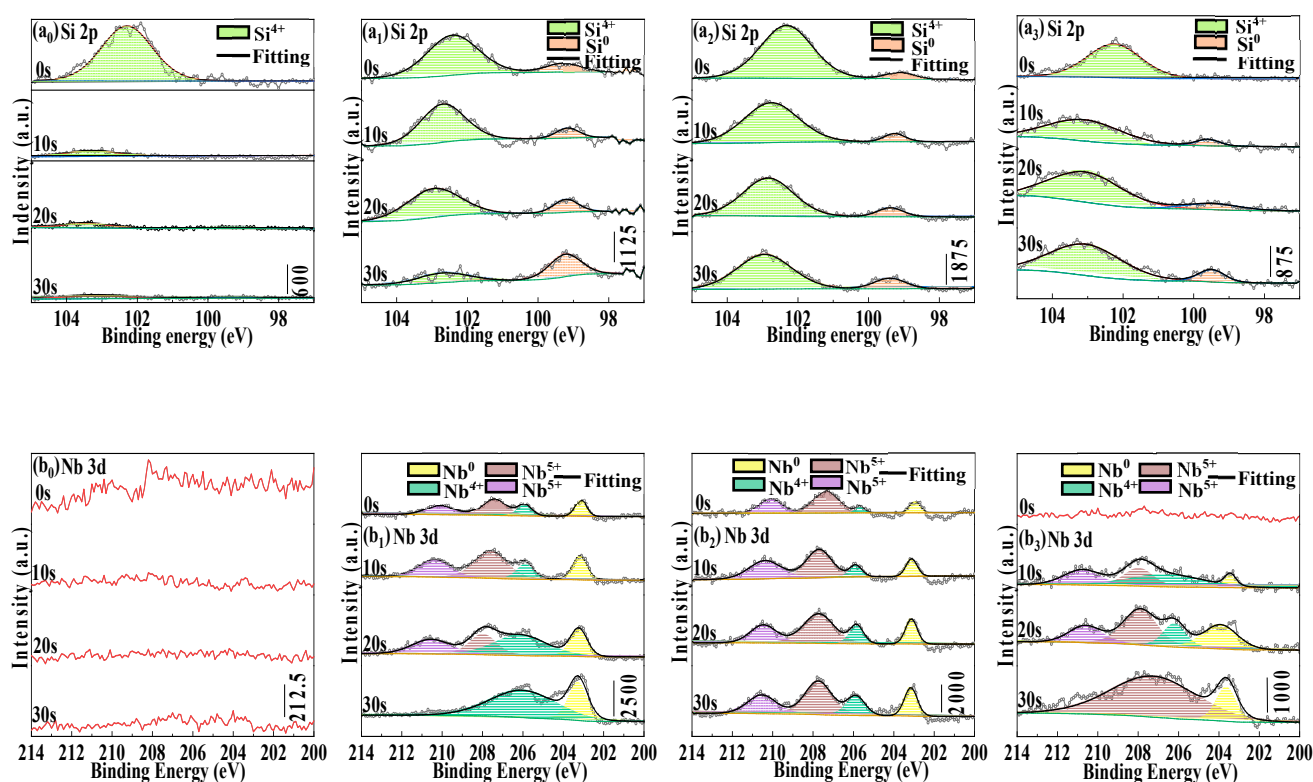

**Figure S1.** XPS spectra of Si 2p and Nb 3d in binding energy regions for the as-spun  $\text{Fe}_{72-x}\text{Cr}_x\text{B}_{19.2}\text{Si}_{4.8}\text{Nb}_4$  ribbons with  $x = 0$  (Cr0),  $x = 7.2$  (Cr7),  $x = 21.6$  (Cr21), and  $x = 36$  (Cr36) after corrosion in neutral solutions.

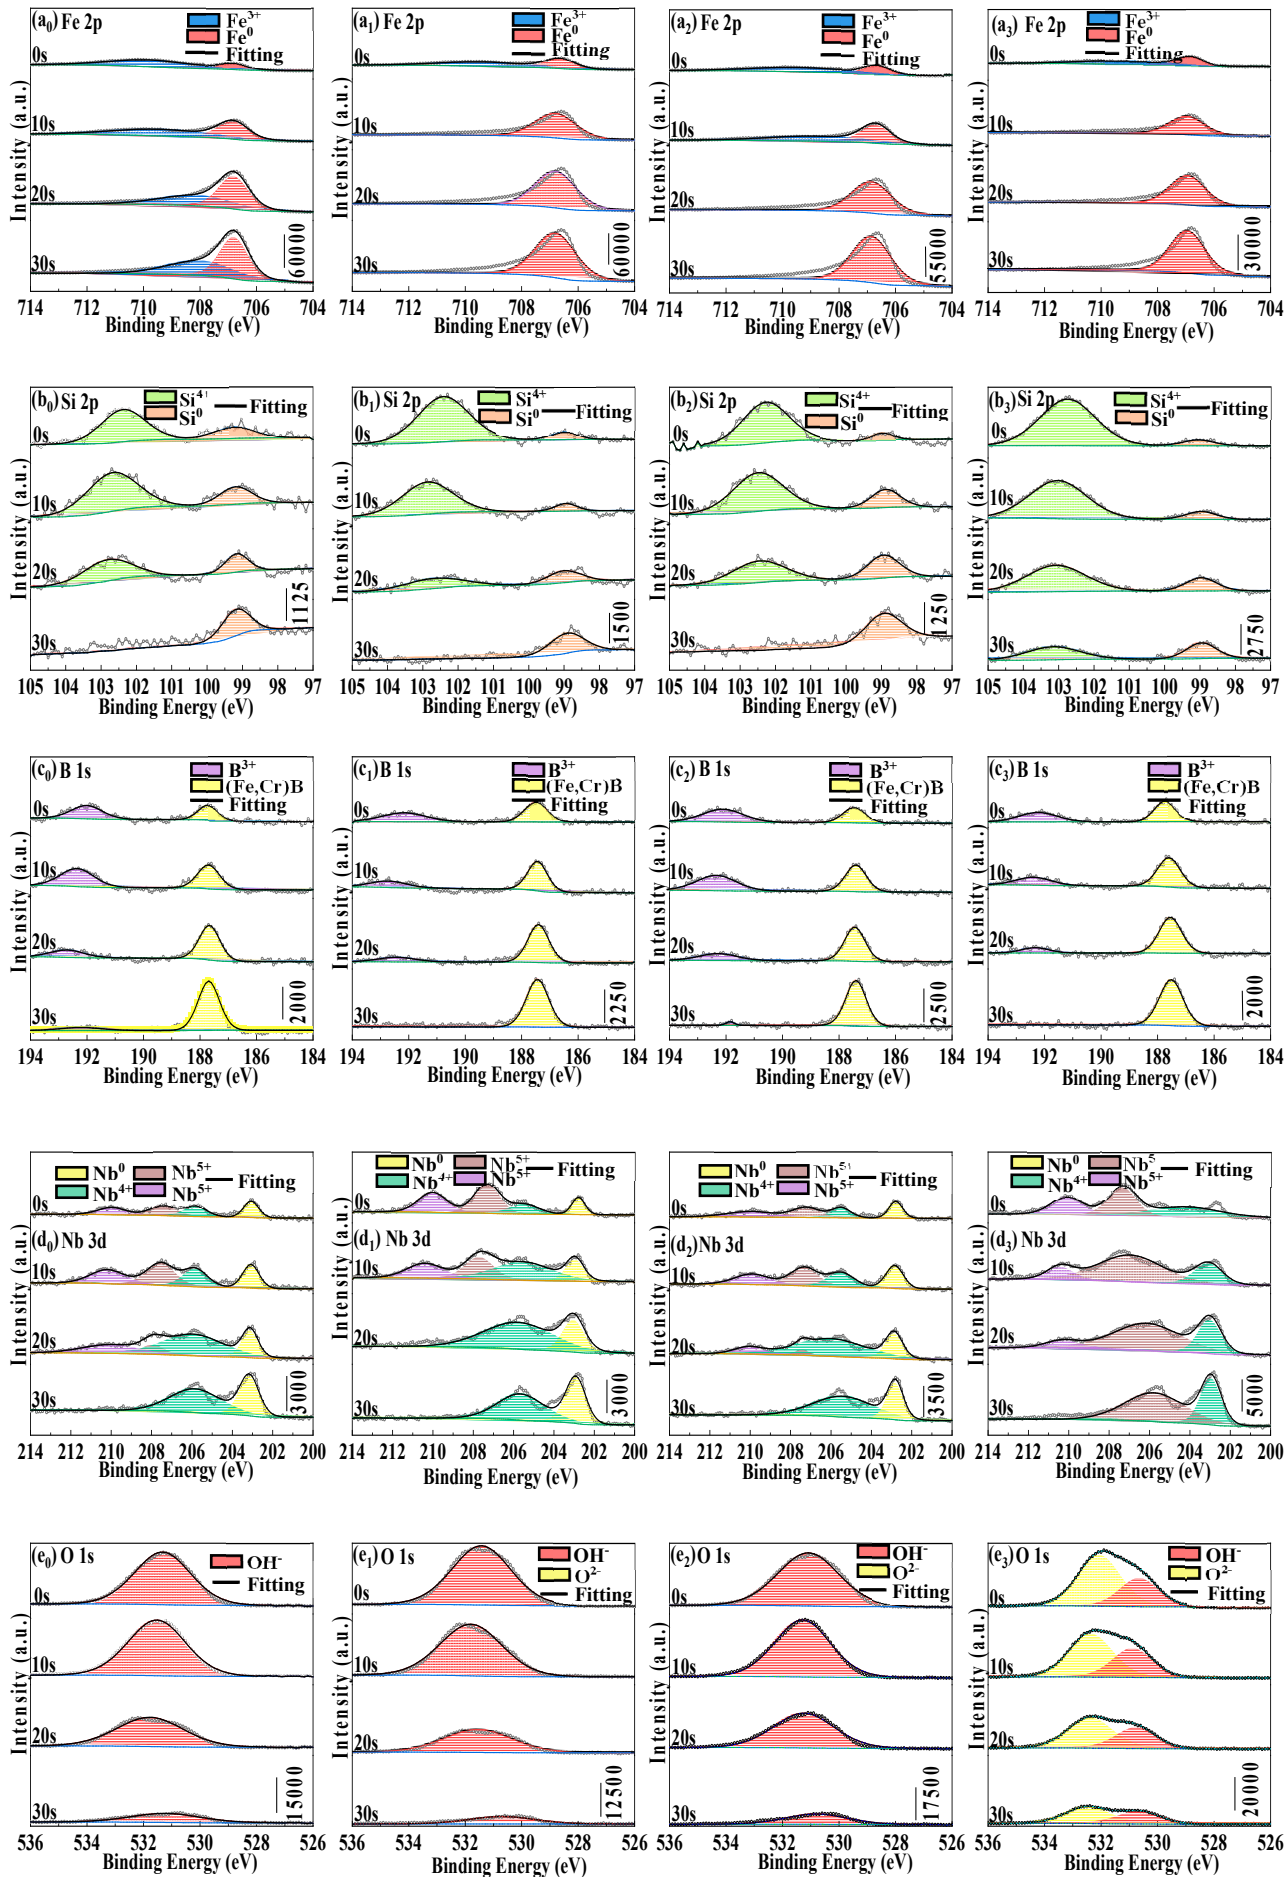

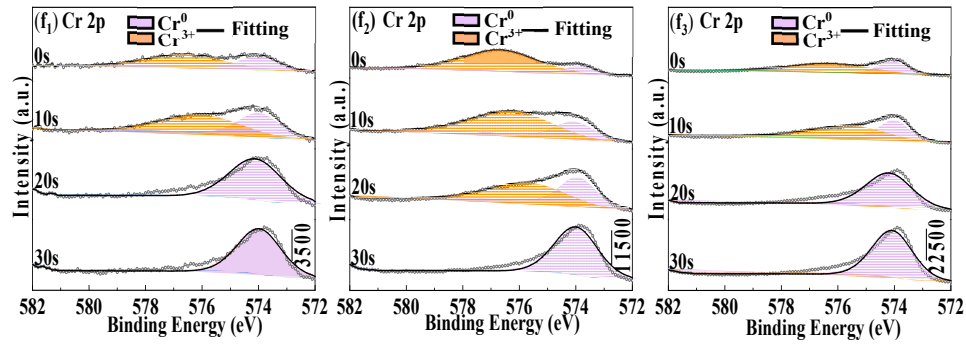

**Figure S2.** XPS spectra of Fe 2p, Si 2p, B 1s, Nb 3d O 1s and Cr 2p in binding energy regions for the as-spun  $\text{Fe}_{72-x}\text{Cr}_x\text{B}_{19.2}\text{Si}_{4.8}\text{Nb}_4$  ribbons with  $x = 0$  (Cr0),  $x = 7.2$  (Cr7),  $x = 21.6$  (Cr21), and  $x = 36$  (Cr36).

**Table S1.** The comparison data of corrosion potential ( $E_{\text{corr}}$ ) and corrosion current density ( $i_{\text{corr}}$ ) of various Fe-based alloys in 3.5 wt.% NaCl solution.

| Sample                                                                                    | $E_{\text{corr}}$ (V) | $i_{\text{corr}}$ ( $\mu\text{A cm}^{-2}$ ) | References |
|-------------------------------------------------------------------------------------------|-----------------------|---------------------------------------------|------------|
| Cr0                                                                                       | -0.69                 | 40.72                                       |            |
| Cr7                                                                                       | -0.56                 | 14.83                                       |            |
| Cr21                                                                                      | -0.55                 | 8.43                                        |            |
| Cr36                                                                                      | -0.50                 | 5.28                                        |            |
| $\text{Fe}_{66}\text{B}_{30}\text{Nb}_4$                                                  | -0.7                  | 15                                          | [1]        |
| $[(\text{Fe}_{0.6}\text{Co}_{0.4})_{0.75}\text{B}_{0.2}\text{Si}_{0.05}]_{96}\text{Nb}_4$ | -0.55                 | 2                                           |            |
| $[(\text{Fe}_{0.7}\text{Co}_{0.3})_{0.75}\text{B}_{0.2}\text{Si}_{0.05}]_{96}\text{Nb}_4$ | -0.63                 | 7                                           |            |
| $\text{Fe}_{56}\text{Cr}_{23}\text{Ni}_{5.7}\text{B}_{16}$                                | -0.13                 | 0.015                                       |            |
| $\text{Fe}_{53}\text{Cr}_{22}\text{Ni}_{5.6}\text{B}_{19}$                                | -0.2                  | 0.06                                        |            |
| $\text{Fe}_{50}\text{Cr}_{22}\text{Ni}_{5.4}\text{B}_{23}$                                | -0.17                 | 0.02                                        |            |
| SS 316LN                                                                                  | -0.2                  | 0.2                                         |            |
| $\text{Fe}_{82}\text{B}_{10}\text{P}_4\text{Si}_3\text{C}$                                | -0.64                 | 41.7                                        |            |
| $\text{Fe}_{82}\text{Cr}_2\text{B}_8\text{P}_4\text{Si}_3\text{C}$                        | -0.63                 | 15.3                                        | [2]        |
| $\text{Fe}_{82}\text{Nb}_9\text{B}_9\text{P}_4\text{Si}_3\text{C}$                        | -0.49                 | 18.2                                        |            |
| $\text{Fe}_{82}\text{Cr}_2\text{Nb}_8\text{B}_8\text{P}_4\text{Si}_2\text{C}$             | -0.42                 | 4.06                                        |            |
| $\text{Fe}_{84}\text{Mo}_2\text{B}_8\text{Si}_2\text{P}_4$                                | -0.68                 | 6.5                                         |            |
| $\text{Fe}_{83}\text{Mo}_2\text{B}_8\text{Si}_2\text{P}_4\text{C}_1$                      | -0.68                 | 1.54                                        | [3]        |
| $\text{Fe}_{84}\text{Cr}_2\text{B}_8\text{Si}_2\text{P}_4$                                | -0.69                 | 0.68                                        |            |
| $\text{Fe}_{83}\text{Cr}_2\text{B}_8\text{Si}_2\text{P}_4\text{C}_1$                      | -0.67                 | 2.05                                        |            |
| FeCrMoNiB                                                                                 | -0.262                | 1.89                                        |            |
| $\text{Fe}_{83.3}\text{B}_{16}\text{Cu}_{0.7}$                                            | -0.743                | 30                                          | [4]        |
| $\text{Fe}_{83.3}\text{Si}_{15}\text{B}_{15}\text{Cu}_{0.7}$                              | -0.738                | 16                                          |            |
| $\text{Fe}_{83.3}\text{Si}_2\text{B}_{14}\text{Cu}_{0.7}$                                 | -0.737                | 22                                          |            |
| $\text{Fe}_{83.3}\text{Si}_3\text{B}_{13}\text{Cu}_{0.7}$                                 | -0.736                | 29                                          |            |
| $\text{Fe}_{72}\text{Ni}_8\text{Si}_{10}\text{B}_{10}$                                    | -0.501                | 15.4                                        | [5]        |
| FeNiB                                                                                     | -0.522                | 13                                          |            |
| FeNiB+6%Cr                                                                                | -0.394                | 4.4                                         | [6]        |
| FeNiB+11% Cr                                                                              | -0.272                | 0.29                                        |            |
| FeNiB+17% Cr                                                                              | -0.256                | 0.15                                        |            |
| FeNiB+26% Cr                                                                              | -0.264                | 0.15                                        |            |
| FeNiB+33% Cr                                                                              | -0.256                | 0.14                                        |            |
| $\text{Fe}_{48}\text{Cr}_{23}\text{Mo}_{10}\text{C}_{14}\text{B}_5$                       | -0.859                | 3.03                                        |            |
| $\text{Fe}_{68}\text{Cr}_8\text{Mo}_4\text{Nb}_4\text{B}_{16}$                            | -0.145                | 0.75                                        | [7]        |
| $\text{Fe}_{60}\text{Cr}_8\text{Nb}_8\text{B}_{24}$                                       | -0.23                 | 0.41                                        | [8]        |
| $\text{Fe}_{75.8}\text{Si}_{12}\text{B}_8\text{Nb}_{2.6}\text{Cu}_{0.6}\text{P}_1$        | -0.579                | 17.4                                        | [9]        |
| $\text{Fe}_{38}\text{Co}_{38}\text{Mo}_8\text{Cu}_1\text{B}_{15}$                         | -0.597                | 8.21                                        | [10]       |
| $\text{Fe}_{39.5}\text{Co}_{39.5}\text{Mo}_8\text{Cu}_1\text{B}_{12}$                     | -0.691                | 20.2                                        | [11]       |
| $\text{Fe}_{42}\text{Co}_{42}\text{Cu}_1\text{B}_{15}$                                    | -0.658                | 12.9                                        |            |
| $\text{Fe}_{63}\text{Co}_{21}\text{Cu}_1\text{B}_{15}$                                    | -0.723                | 33.1                                        |            |
| $\text{Fe}_{84}\text{Cu}_1\text{B}_{15}$                                                  | -0.874                | 36                                          |            |
| $\text{Fe}_{85}\text{B}_{15}$                                                             | -1.010                | 64.7                                        |            |
| Fe-Cr-Mo-C-B                                                                              | -0.799                | 145                                         | [12]       |
| Fe-Cr-P-B-C                                                                               | -0.524                | 3.2                                         |            |

|                          |        |       |
|--------------------------|--------|-------|
| Fe-Cr-Mo-Ni-B-Co-Cu-Si-C | -0.56  | 3.92  |
| Fe-Cr-Mo-Ni-P-B-C-Si     | -0.45  | 8.3   |
| Fe-Cr-Mo-C-B-Y           | -0.559 | 4.12  |
| Fe-Cr-Mo-C-B             | -0.546 | 10    |
| Fe-C-Si-B-P-Cr-Mo-Al     | -0.707 | 2.3   |
| Fe-Cr-Mo-C-B-Y           | -0.458 | 11.3  |
| Fe-Cr-Si-B-C             | -0.641 | 31.85 |
| Fe-Cr-P-B-C              | -0.647 | 4.3   |
| Fe-Cr-Mo-C-B-Y           | -0.679 | 5.091 |
| Fe-Mo-Cr-Co              | -0.438 | 6.9   |
| Fe-Cr-Mo-B-C             | -0.333 | 52.2  |
| Fe-Cr-Mo-B-C-P           | -0.415 | 1.1   |

### The Supplementary References:

1. Botta, W. J.; Berger, J. E.; Kiminami, C. S.; Roche, V.; Nogueira, R. P.; Bolfarini, C., Corrosion resistance of Fe-based amorphous alloys. *Journal of Alloys and Compounds* **2014**, 586, S105-S110.
2. Han, Y.; Chang, C. T.; Zhu, S. L.; Inoue, A.; Louzguine-Luzgin, D. V.; Shalaan, E.; Al-Marzouki, F., Fe-based soft magnetic amorphous alloys with high saturation magnetization above 1.5 T and high corrosion resistance. *Intermetallics* **2014**, 54, 169-175.
3. Han, Y.; Kong, F. L.; Han, F. F.; Inoue, A.; Zhu, S. L.; Shalaan, E.; Al-Marzouki, F., New Fe-based soft magnetic amorphous alloys with high saturation magnetization and good corrosion resistance for dust core application. *Intermetallics* **2016**, 76, 18-25.
4. Fan, Y.; Zhang, S.; Xu, X.; Miao, J.; Zhang, W.; Wang, T.; Chen, C.; Wei, R.; Li, F., Effect of the substitution of Si for B on thermal stability, magnetic properties and corrosion resistance in novel Fe-rich amorphous soft magnetic alloy. *Intermetallics* **2021**, 138, 107306.
5. Vasić, M. M.; Simatović, I. S.; Radović, L.; Minić, D. M., Influence of microstructure of composite amorphous/nanocrystalline Fe<sub>72</sub>Ni<sub>8</sub>Si<sub>10</sub>B<sub>10</sub> alloy on the corrosion behavior in various environments. *Corrosion Science* **2022**, 204, 110403.
6. Berger, J. E.; Jorge, A. M.; Koga, G. Y.; Roche, V.; Kiminami, C. S.; Bolfarini, C.; Botta, W. J., Influence of chromium concentration and partial crystallization on the corrosion resistance of FeCrNiB amorphous alloys. *Materials Characterization* **2021**, 179, 111369.
7. Wu, L.; Zhou, Z.; Zhang, K.; Zhang, X.; Wang, G., Electrochemical and passive film evaluation on the corrosion resistance variation of Fe-based amorphous coating affected by high temperature. *Journal of Non-Crystalline Solids* **2022**, 597, 121892.
8. Coimbrão, D. D.; Zepon, G.; Koga, G. Y.; Godoy Pérez, D. A.; Paes de Almeida, F. H.; Roche, V.; Lepretre, J. C.; Jorge, A. M.; Kiminami, C. S.; Bolfarini, C.; Inoue, A.; Botta, W. J., Corrosion properties of amorphous, partially, and fully crystallized Fe<sub>68</sub>Cr<sub>8</sub>Mo<sub>4</sub>Nb<sub>4</sub>B<sub>16</sub> alloy. *Journal of Alloys and Compounds* **2020**, 826, 154123.
9. Koga, G. Y.; Nogueira, R. P.; Roche, V.; Yavari, A. R.; Melle, A. K.; Gallego, J.; Bolfarini, C.; Kiminami, C. S.; Botta, W. J., Corrosion properties of Fe–Cr–Nb–B amorphous alloys and coatings. *Surface and Coatings Technology* **2014**, 254, 238-243.
10. Liu, Y.; Li, J.; Sun, Y.; He, A.; Dong, Y.; Wang, Y., Effect of annealing temperature on magnetic properties and corrosion resistance of Fe<sub>75.8</sub>Si<sub>12</sub>B<sub>8</sub>Nb<sub>2.6</sub>Cu<sub>0.6</sub>P<sub>1</sub> alloy. *Journal of Materials Research and Technology* **2021**, 15, 3880-3894.
11. Sunbul, S. E.; Akyol, S.; Onal, S.; Ozturk, S.; Sozeri, H.; Icin, K., Effect of Co, Cu, and Mo alloying metals on electrochemical and magnetic properties of Fe-B alloy. *Journal of Alloys and Compounds* **2023**, 947, 169652.
12. Meghwal, A.; Pinches, S.; King, H. J.; Schulz, C.; Stanford, N.; Hall, C.; Berndt, C. C.; Ang, A. S. M., Fe-based amorphous coating for high-temperature wear, marine and low pH environments. *Materialia* **2022**, 25, 101549.
